## Correction

# Correction: ABCC5, a Gene That Influences the Anterior Chamber Depth, Is Associated with Primary Angle Closure Glaucoma

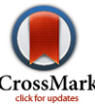**The PLOS Genetics Staff**

Dr. Vernon K Y Yong is not included in the author byline. He should be listed as the forty second author and affiliated with Department of Ophthalmology, Tan Tock Seng Hospital, Singapore.

**Reference**

1. Nongpiur ME, Khor CC, Jia H, Cornes BK, Chen L-J, et al. (2014) ABCC5, a Gene That Influences the Anterior Chamber Depth, Is Associated with Primary Angle Closure Glaucoma. PLoS Genet 10(3): e1004089. doi:10.1371/journal.pgen.1004089

**Citation:** The PLOS Genetics Staff (2014) Correction: ABCC5, a Gene That Influences the Anterior Chamber Depth, Is Associated with Primary Angle Closure Glaucoma. PLoS Genet 10(4): e1004352. doi:10.1371/journal.pgen.1004352

**Published:** April 4, 2014

**Copyright:** © 2014 The PLOS Genetics Staff. This is an open-access article distributed under the terms of the Creative Commons Attribution License, which permits unrestricted use, distribution, and reproduction in any medium, provided the original author and source are credited.
